# Supplementary material for: Analysis of phosphorylation site occupancy of peptides based on a chemical derivatization method
Source: Royal Society of Chemistry journal article supplement (doi:10.1039/d4ay02208d), 2025-01-01
Supplement: d4ay02208d1.xlsx [file d4ay02208d1.xlsx]

## Sheet: casein
sequence	charge	modifications	source	m/z d0-DMA	A/e5 d0-DMA	m/z d6-DMA	A/e5 d6-DMA	m/z non-phos	A/e5 non-phos
KENLCSTFCK	3+	2,d3-MA(DE)(None);5,Carbamidomethyl[C](None);6,d0-DMA(ST)(None);7,d0-DMA(ST)(None);9,Carbamidomethyl[C](None);11,d3-MA(C-term)(None);	casein-1	458.27	4.048	462.29	4.267	440.23	1.998
			casein-2		3.495		5.109		1.29
			casein-3		1.101		1.601		0.4205
TVDMESTEVFTK	2+	3,d3-MA[DE](None);5,d3-MA[DE](None);6,d0-DMA[ST](None);8,d3-MA[DE](None);13,d3-MA[C-Term](None);	casein-1	739.451	72.28	742.47	85.09	725.927	117.471
			casein-2		72.53		75.83		133.513
			casein-3		59.211		53.564		60.411
SSSEESITR	2+	2,d0-DMA[ST](None);4,d3-MA[DE](None);5,d3-MA[DE](None);10,d3-MA[C-Term](None);	casein-1	535.83	2.455	538.85	4.315	522.31	137.4
			casein-2		1.829		3.008		112.7
			casein-3		0.1431		1.051		60.57
EKFQSEE	2+	1,d3-MA(DE)(None);5,d0-DMA(ST)(None);6,d3-MA(DE)(None);7,d3-MA(DE)(None);8,d3-MA(C-term)(None);	casein-1	494.33	6.955	497.35	4.423	480.8	106.8
			casein-2		4.95		5.082		78.63
			casein-3		2.121		1.83		45.76
PFLQPEVMGVSKVK	3+	6,d3-MA(DE)(None);8,Oxidation[M](None); 11,d0-DMA(ST)(None); 15,d3-MA(C-term)(None);	casein-1	545.34	51.35	547.35	41.799	536.33	14.8
			casein-2		61.81		43.72		14.22
			casein-3		23.76		20.16		7.1
DIGSESTEDQAMEDIK	3+	1,d3-MA[DE](None);4,d0-DMA[ST](None);5,d3-MA[DE](None);6,d0-DMA[ST](None);8,d3-MA[DE](None);9,d3-MA[DE](None);13,d3-MA[DE](None);14,d3-MA[DE](None);17,d3-MA[C-Term](None);	casein-1	645.389	71.6	649.414	72.19	627.37	6.268
			casein-2		68.76		66.34		6.013
			casein-3		13.72		15.49		2.998
HIQKEDVPSER	3+	5,d3-MA[DE](None);6,d3-MA[DE](None);9,d0-DMA[ST](None);10,d3-MA[DE](None);12,d3-MA[C-Term](None);	casein-1	476.98	16.554	478.99	11.814	467.97	356.8
			casein-2		10.716		11.263		340.06
			casein-3		4.923		4.1		207.42
IVPNSAEER	2+	5,d0-DMA[ST](None);7,d3-MA[DE](None);8,d3-MA[DE](None);10,d3-MA[C-Term](None);	casein-1	545.36	20.23	548.38	19.22	531.824	24.17
			casein-2		63.53		66.89		46.23
			casein-3		7.035		6.746		16.48
EERLHSMK	2+	1,d3-MA[DE](None);2,d3-MA[DE](None); 6,d0-DMA[ST](None);9,d3-MA[C-Term](None);	casein-1	552.86	3.878	555.88	3.141	539.34	1.51
			casein-2		2.564		1.491		1.044
			casein-3		0.7476		0.2806		0.4974
APSFSDIPNPIGSE	2+	3,d0-DMA(ST)(None);6,d3-MA(DE)(None);14,d3-MA(DE)(None);15,d3-MA(C-term)(None);	casein-1	753.44	39.231	756.46	27.673	739.92	14.08
			casein-2		39.115		34.861		18.19
			casein-3		16.001		12.41		12.09

## Sheet: tissues
sequence	charge	modifications	source	m/z d0-DMA	A/e5 d0-DMA	m/z d6-DMA	A/e5 d6-DMA	m/z non-phos	A/e5 non-phos
IMITQTTDTVNE	2+	2,Oxidation[M](None);7,d0-DMA(ST)(None);11,Deamidated[N](None);12,d3-MA(DE)(None);13,d3-MA(C-term)(None);	liver-1	721.4	17.21	724.42	18.78	707.89	3.384
			liver-2		20.8		19.83		3.088
			liver-3		18.93		16.37		3.927
			kidney-1		17.33		16.47		6.553
			kidney-2		19.14		18.86		4.021
			kidney-3		17.87		18.05		5.862
EFSPSFQHRGNR	2+	1,d3-MA(DE)(None);3,d0-DMA(ST)(None);13,d3-MA(C-term)(None);	liver-1	760.93	3.825	763.95	3.798	745.62	1.14
			liver-2		4.487		4.273		1.352
			liver-3		3.752		3.059		0.9655
			kidney-1		5.213		4.815		1.279
			kidney-2		4.275		4.311		1.53
			kidney-3		5.121		4.725		1.249
QIDQTQNQLNK	2+	3,d3-MA(DE)(None);5,d0-DMA(ST)(None);7,Deamidated[N](None);12,d3-MA(C-term)(None);	liver-1	695.39	2.816	698.41	3.455	681.88	2.288
			liver-2		4.608		5.249		1.254
			liver-3		4.21		3.174		1.264
			kidney-1		3.309		4.406		--
			kidney-2		3.584		3.698		--
			kidney-3		3.87		3.742		--
FYNSIMWVKE	2+	4,d0-DMA(ST)(None);6,Oxidation[M](None);7,Oxidation[W](None);10,d3-MA(DE)(None);11,d3-MA(C-term)(None);	liver-1	704.37	2.384	707.39	2.924	690.86	2.028
			liver-2		5.871		4.905		3.32
			liver-3		5.013		4.158		2.519
			kidney-1		9.2708		8.69075		--
			kidney-2		8.41808		8.43493		--
			kidney-3		9.9541		9.30763		--
LLWGSRGSE	2+	8,d0-DMA(ST)(None);9,d3-MA(DE)(None);10,d3-MA(C-term)(None);	liver-1	532.35	23.897	535.36	14.125	518.84	6.563
			liver-2		27.41		20.42		6.097
			liver-3		3.089		0.6502		6.287
MYSKGASE	2+	1,Oxidation[M](None);3,d0-DMA(ST)(None);8,d3-MA(DE)(None);9,d3-MA(C-term)(None);	liver-1	474.26	6.289	477.28	5.884	460.75	6.363
			liver-2		7.689		6.605		6.4
			liver-3		6.631		5.548		6.307
			kidney-1		6.159		5.702		4.345
			kidney-2		6.815		7.679		4.484
			kidney-3		7.469		8.195		3.961
TIVSIGDPK	2+	1,d0-DMA(ST)(None);7,d3-MA(DE)(None);10,d3-MA(C-term)(None);	liver-1	494.84	15.68	497.86	14.73	481.33	182.8
			liver-2		17.39		15.36		180.9
			liver-3		18.9		15.14		170.8
			kidney-1		12.474		12.769		313
			kidney-2		7.421		6.604		257.3
			kidney-3		7.564		7.024		261.7
DLTGDLSETFAE	2+	1,d3-MA(DE)(None);3,d0-DMA(ST)(None);5,d3-MA(DE)(None);8,d3-MA(DE)(None);12,d3-MA(DE)(None);13,d3-MA(C-term)(None);	liver-1	702.94	3.132	705.96	2.194	689.43	20.61
			liver-2		1.553		0.2389		22.82
			liver-3		1.429		0.1892		20.37
			kidney-1		8.252		6.872		5.218
			kidney-2		8.715		6.101		3.85
			kidney-3		15.26		11.55		4.768
ESQVMGTTMSNVK	2+	1,d3-MA(DE)(None);7,DMA(ST)(None);9,Oxidation[M](None);14,d3-MA(C-term)(None);	liver-1	743.9	2.0739	746.92	2.2854	730.39	--
			liver-2		2.7961		2.8983		--
			liver-3		2.1896		2.3482		--
			kidney-1		4.0016		4.1152		--
			kidney-2		3.50164		3.568		--
			kidney-3		3.12618		3.068		--
TTPAVTSGGGK	2+	1,DMA(ST)(None);12,DMA(C-term)(None);	liver-1	515.31	12.587	518.33	13.13	501.8	--
			liver-2		22.6		16.7		--
			liver-3		16.446		12.733		--
IQGLDGFLKMQGTR	3+	5,d3-MA(DE)(None);13,d0-DMA(ST)(None);15,d3-MA(C-term)(None);	liver-1	541.66	3.407	543.67	2.982	532.65	--
			liver-2		7.912		6.54		--
			liver-3		6.126		5.789		--
			kidney-1		9.261		8.775		0.7774
			kidney-2		7.795		6.817		0.884
			kidney-3		7.403		6.209		0.5796
LSTENVR	2+	3,d0-DMA(ST)(None);8,d3-MA(C-term)(None);	kidney-1	431.27	7.004	434.29	8.249	417.76	6.452
			kidney-2		5.676		5.805		3.258
			kidney-3		3.107		5.83		2.669
ALLASLSR	2+	7,d0-DMA(ST)(None);9,d3-MA(C-term)(None);	kidney-1	437.31	8.141	440.33	8.147	423.8	7.75
			kidney-2		9.137		8.754		6.327
			kidney-3		8.24		8.147		6.564
AAPETVVK	2+	4,d3-MA(DE)(None);5,d0-DMA(ST)(None);9,d3-MA(C-term)(None);	kidney-1	437.31	16.69	440.33	10.02	423.8	27.24
			kidney-2		9.948		8.424		18.41
			kidney-3		12.93		9.517		30.21
ETDLGNYTCTVE	2+	2,d0-DMA(ST)(None);3,d3-MA(DE)(None);9,Carbamidomethyl[C](None);10,d0-DMA(ST)(None);12,d3-MA(DE)(None);13,d3-MA(C-term)(None);	kidney-1	752.41	1.368	755.43	1.528	725.37	6.018
			kidney-2		0.3382		0.5455		4.97
			kidney-3		4.141		4.653		4.504
DDEIAALVVDNGSGMCK	2+	0,Acetyl[ProteinN-term](None);1,d3-MA(DE)(None);2,d3-MA(DE)(None);3,d3-MA(DE)(None);10,d3-MA(DE)(None);11,Deamidated[N](None);13,DMA(ST)(None);18,d3-MA(C-term)(None);	kidney-1	944.05	0.5918	947.07	0.5853	928.74	--
			kidney-2		0.19206		0.18671		--
			kidney-3		0.3425		0.2649		--
