# Supplementary material for: Analysis of phosphorylation site occupancy of peptides based on a chemical derivatization method
Source: Royal Society of Chemistry journal article supplement (doi:10.1039/d4ay02208d), 2025-01-01
Supplement: d4ay02208d2.pdf [file d4ay02208d2.pdf]

**Supporting Information**

1     **Analysis of phosphorylation site occupancy of peptides based on a**  
2                                   **chemical derivatization method**

3     Xingdan Wang,<sup>a</sup> Zhenghu Min,<sup>a</sup> Xiaoqiu Yang,<sup>a</sup> Qiwei Zhang <sup>\*a</sup> and Qi Zheng <sup>a</sup>

4  
5

6     <sup>a</sup> Key Laboratory of Flexible Optoelectronic Materials and Technology, Ministry of  
7     Education, Jiangnan University, Wuhan 430056, Hubei, People's Republic of China.

8  
9  
10  
11  
12  
13  
14  
15  
16  
17  
18  
19  
20  
21  
22  
23  
24  
25  
26  
27  
28  
29

30

31     \*Corresponding author: Dr. Qiwei Zhang, School of Optoelectronic Materials &  
32     Technology, Jiangnan University, Wuhan, 430056, China, E-mail:  
33     keewezhang@jhun.edu.cn

34

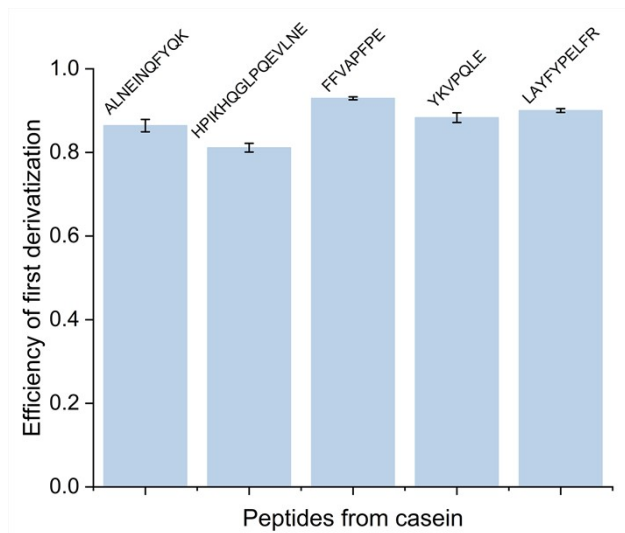

1

2 **Fig.S1** The initial derivatization efficiency for the five peptides derived from casein ranges from  
 3 81.14% to 92.95% (n=3).

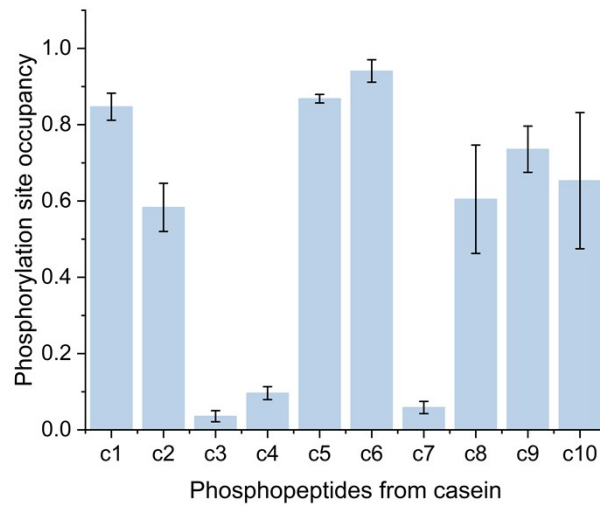

4

5 **Fig.S2** The phosphorylation site occupancies of 10 peptides derived from bovine casein exhibit a  
 6 range of 3.58% to 94.09% (n = 3). For further information regarding peptides, please refer to Table  
 7 S2.

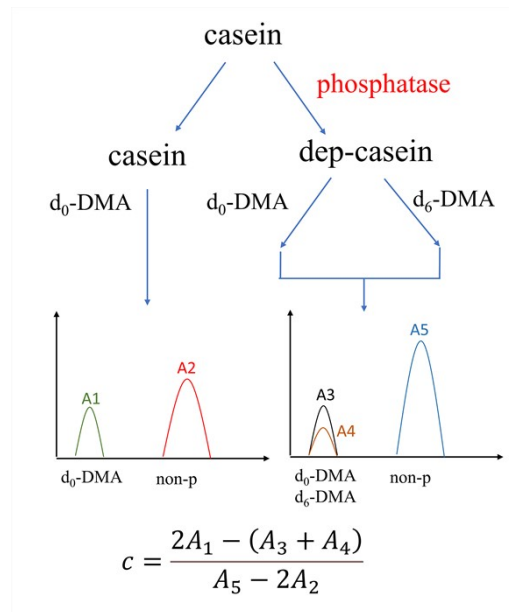

1

2 **Fig.S3** The evaluation strategy for the investigation of the difference in ionization efficiency  
 3 between DMA-labeled phosphopeptides and their non-phosphorylated forms. The c values for three  
 4 typical peptides derived from casein were calculated according to the aforementioned formulae,  
 5 yielding the following results: IVPNSAEER, 7.7; DIGSESTEDAQMEDIK, 0.28; and  
 6 APSFSDIPNPIGSE, -4.2 ( $A_5 < 2A_2$ ).

7

8

9

1

**Table. S1** The phosphorylation site occupancies of peptides from casein.

| Peptide No. | Sequence           | Occupancy-1 | Occupancy-2 | Occupancy-3 | Average±SD   |
|-------------|--------------------|-------------|-------------|-------------|--------------|
| c1          | KENLCpSTFCK        | 80.63%      | 86.96%      | 86.53%      | 84.71±3.54%  |
| c2          | TVDMEpSTEVFTK      | 57.26%      | 52.63%      | 65.12%      | 58.34±6.31%  |
| c3          | SpSSEESITR         | 4.70%       | 4.12%       | 1.93%       | 3.58±1.46%   |
| c4          | EKFQpSEE           | 9.63%       | 11.31%      | 7.95%       | 9.63±1.68%   |
| c5          | PFLQPEVMGVpSKVK    | 86.29%      | 88.13%      | 86.08%      | 86.83±1.12%  |
| c6          | DIGpSEpSTEDQAMEDIK | 95.82%      | 95.74%      | 90.69%      | 94.09±2.94%  |
| c7          | HIQKEDVpSER        | 7.36%       | 6.07%       | 4.17%       | 5.87±1.61%   |
| c8          | IVPNpSAEER         | 62.01%      | 73.83%      | 45.54%      | 60.46±14.21% |
| c9          | EERLHpSMK          | 82.30%      | 79.53%      | 67.40%      | 73.58±6.07%  |
| c10         | APpSFSDIPNPIGSE    | 82.61%      | 80.26%      | 70.15%      | 65.32±17.86% |

1 **Table. S2** The phosphorylation site occupancies of peptides from goldfish tissue samples.

2 Peptides with an identical No. were identified in both the liver and kidney tissues.

| Tissue | Peptide No. | Sequence          | Occupancy-1 | Occupancy-2 | Occupancy-3 | Average±SD   |
|--------|-------------|-------------------|-------------|-------------|-------------|--------------|
| Liver  | p1          | IMITQTpTDTVNE     | 91.41%      | 92.94%      | 89.99%      | 91.44±1.47%  |
|        | p2          | EFpSPSFQHRGNR     | 86.99%      | 86.63%      | 87.58%      | 87.07±0.48%  |
|        | p3          | QIDQpTQNQLNK      | 73.27%      | 88.71%      | 85.38%      | 82.46±8.13%  |
|        | p4          | FYNpSIMWVKE       | 72.36%      | 76.45%      | 78.45%      | 75.75±3.11%  |
|        | p5          | MYpSKGASE         | 65.67%      | 69.07%      | 65.88%      | 66.88±1.91%  |
|        | p6          | pTIVSIGDPK        | 14.26%      | 15.33%      | 16.62%      | 15.40±1.18%  |
|        | p7          | DLpTGDLSETFAE     | 20.54%      | 7.28%       | 7.36%       | 11.73±7.63%  |
|        | p8          | IQGLDGFLKMQGpTR   |             | N.N.D.*     |             | 100.00%      |
|        | p9          | ESQVMGpTTMSNVK    |             | N.N.D.      |             | 100.00%      |
|        | p10         | pTTPAVTSGGGK      |             | N.N.D.      |             | 100.00%      |
|        | p11         | LLWGSRGpSE        | 85.28%      | 88.69%      | 37.29%      | 70.42±28.74% |
| Kidney | p1          | IMITQTpTDTVNE     | 83.67%      | 90.43%      | 85.97%      | 86.69±3.44%  |
|        | p2          | EFpSPSFQHRGNR     | 88.69%      | 84.88%      | 88.74%      | 87.44±2.21%  |
|        | p3          | QIDQpTQNQLNK      |             | N.N.D.      |             | 100.00%      |
|        | p4          | FYNpSIMWVKE       |             | N.N.D.      |             | 100.00%      |
|        | p5          | MYpSKGASE         | 73.19%      | 76.37%      | 79.82%      | 76.46±3.32%  |
|        | p6          | pTIVSIGDPK        | 74.35%      | 79.37%      | 84.90%      | 79.54±5.28%  |
|        | p7          | DLpTGDLSETFAE     | 95.87%      | 94.30%      | 95.92%      | 95.36±0.92%  |
|        | p8          | IQGLDGFLKMQGpTR   | 70.27%      | 77.90%      | 77.00%      | 75.06±4.17%  |
|        | p9          | ESQVMGpTTMSNVK    |             | N.N.D.      |             | 100.00%      |
|        | p12         | LSpTENVR          | 67.76%      | 73.87%      | 71.40%      | 71.01±3.07%  |
|        | p13         | ALLASLpSR         | 49.51%      | 49.45%      | 42.63%      | 47.20±3.96%  |
|        | p14         | AAPEpTVVK         | 32.49%      | 15.10%      | 66.13%      | 37.91±25.95% |
|        | p15         | EpTDLGNYTCpTVE    | 83.67%      | 90.43%      | 85.97%      | 86.69±3.44%  |
|        | p16         | DDEIAALVVDNGpSGMC |             | N.N.D.      |             | 100.00%      |

K

3 \*: Non-phosphorylated peptide was not detected.
